# Supplementary material for: Evolution of Old World monkeys and great apes links to massive and directional shrinkage of the dinucleotide short tandem repeat compartment
Source: Research Square preprint supplement (doi:10.21203/rs.3.rs-441796/v1), 2021-04-26
Supplement: Supplementary file 1 [file 60869b002eb661c90c9e3f12.docx]

**Primate Speciation Links to Massive and Directional Shrinkage of the Dinucleotide Short Tandem Repeat Compartment.**

Arabfard M1*, Salesi M1, Arabipour I2, Ohadi M3*

1. Chemical Injuries Research Center, Systems Biology and Poisonings Institute, Baqiyatallah University of Medical Sciences, Tehran, Iran.
2. Department of Biotechnology, Science and Research Branch, Islamic Azad University, Tehran, Iran.
3. Iranian research center on aging, University of social welfare and rehabilitation sciences, Tehran, Iran.

***Correspondence Author**

**Keywords:** dinucleotide; short tandem repeat; directional; Old World monkey; great ape; rodent

**Dinucleotide Short Tandem Repeat Finder (Di-Finder).**

In order to find short tandem repeat sequences in a large sequence, a repeating loop is designed equal to the length of the large sequence Inside this loop. All consecutive di-nucleotides are examined and their list is extracted. This process is checked by a regular expression algorithm.

A regular expression is a sequence of characters that defines a search pattern. These patterns are usually used by sequence search algorithms to "find" operations on sequences. This is a technique used in computer science, especially in formal language theory. The following state machine automata represent all algorithm states.

q0

q2

q1

Repeat

This process is repeated for the length of the sequence for each nucleotide pair. The implemented algorithm does not support mismatches (only perfect/pure STRs are analyzed). Following is an overview of the algorithm and Pseudo-code used:


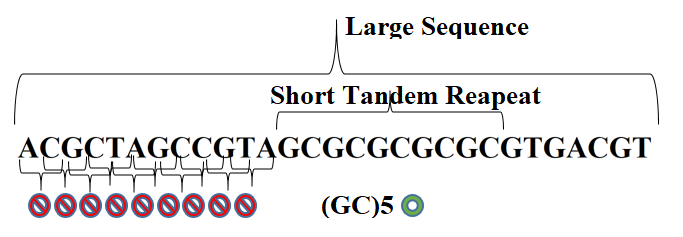


**Pseudo Code for Di-Finder:**

int len_seq = sequence.Length;

for (int i = 0; i < len_seq ; i++)

{

for (int j = min_length; j < max_length + 1; j++)

{

if ((i + j) > len_seq) { break; }

string sub_seq = sequence.Substring(i, j);

double len_sub_seq = sub_seq.Length;

string sub_seq_pattern = sub_seq;

int matches = 1;

while (Regex.IsMatch(sub_seq_pattern, sequence.Substring(i + j *matches, j)))

{

matches++;

}

if (matches >= min_repeats && (j * matches) >= min_length_of_MR)

{

microsatellite.Add(sequence.Substring(i, j * matches).Substring(0,j));

i += j * matches;

}

}

}
